# Supplementary material for: Comparisons of Drug-Eluting Balloon versus Drug-Eluting Stent in the Treatment of Young Patients with Acute Myocardial Infarction
Source: MDPI journal article supplement (doi:10.3390/jcdd10010029), 2023-01-13
Supplement: s1 [file s1]

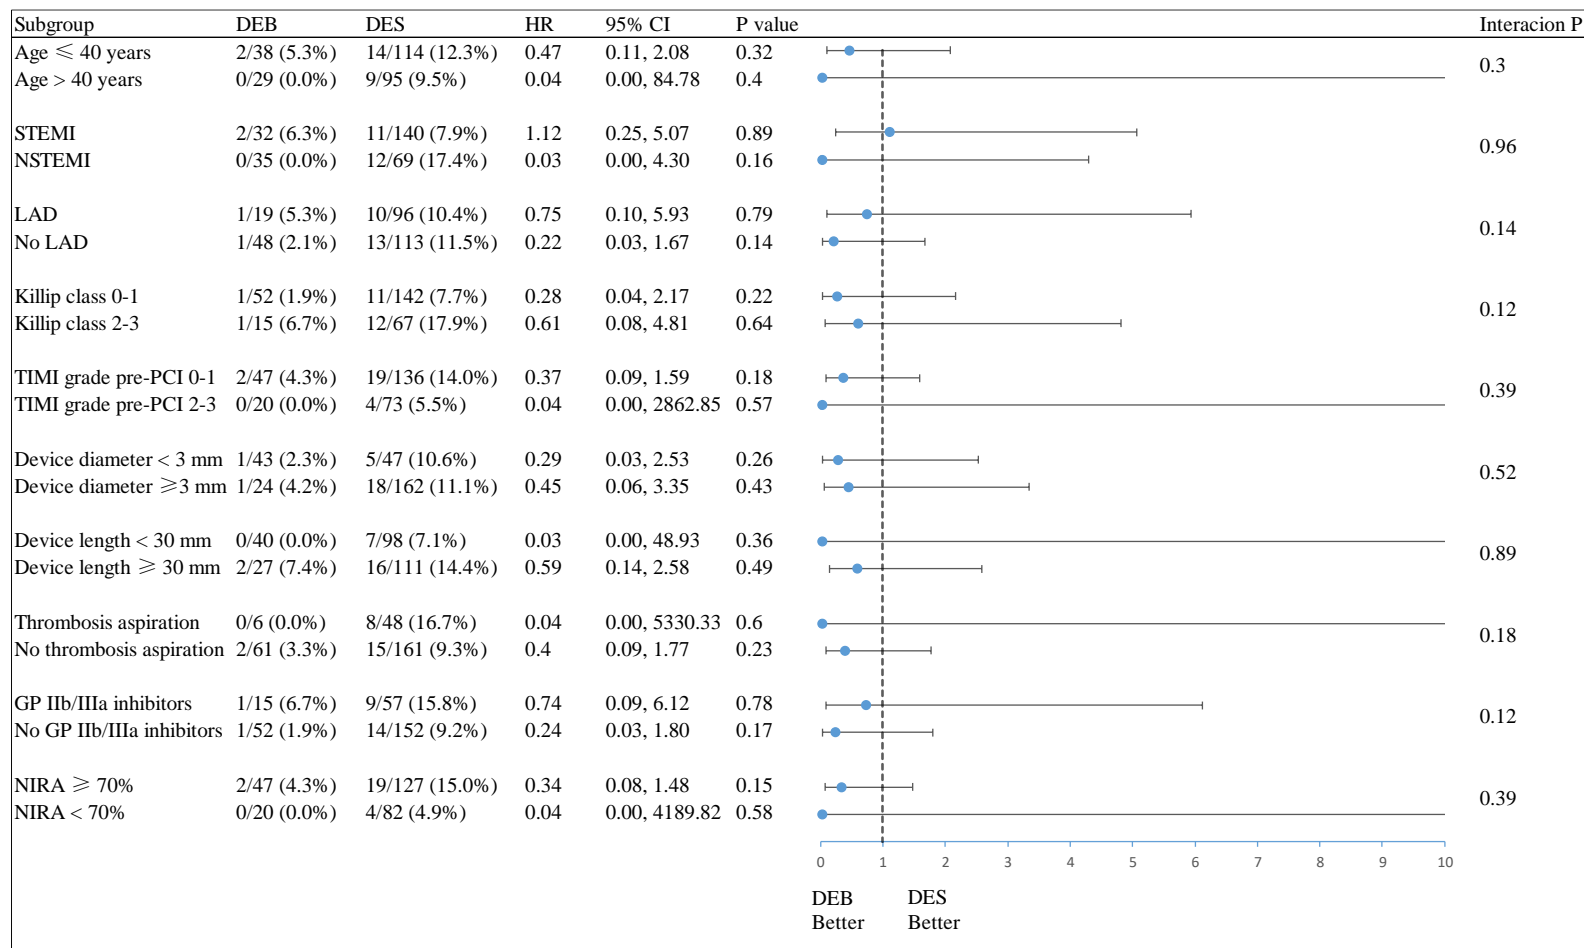

**Supplementary Figure S1.** Influence of the 10 pre-specified variables on the risk of DOCE between the two treatment groups. All interaction tests were negative. STEMI: ST-segment elevation myocardial infarction; NSTEMI: non-ST-segment elevation myocardial infarction; LAD: left anterior descending; TIMI: thrombolysis in myocardial infarction; GP: Glycoprotein; NIRA: non-infarct related artery.

**Supplementary Table S1. Multivariate regression analysis of the predictors for major bleeding events.**

| Variables                       | HR    | 95% CI        | <i>p</i> value |
|---------------------------------|-------|---------------|----------------|
| Age                             | 0.916 | 0.799, 1.050  | 0.207          |
| DEB                             | 0.855 | 0.054, 13.469 | 0.912          |
| NSTEMI                          | 0.240 | 0.045, 1.281  | 0.095          |
| Killip class $\geq 2$           | 0.529 | 0.107, 2.625  | 0.436          |
| Left anterior descending artery | 0.607 | 0.165, 2.237  | 0.454          |
| TIMI grade $\leq 1$             | 0.407 | 0.102, 1.627  | 0.203          |
| DEB or DES number               | 1.374 | 0.210, 8.983  | 0.740          |
| DEB or DES diameter             | 1.092 | 0.783, 1.522  | 0.604          |
| DEB or DES length               | 0.996 | 0.931, 1.065  | 0.902          |
| Thrombus aspiration             | 0.820 | 0.151, 4.444  | 0.818          |
| Glycoprotein IIb/IIIa therapy   | 0.319 | 0.038, 2.692  | 0.293          |
| NIRA $> 70\%$                   | 0.375 | 0.100, 1.403  | 0.145          |
| DAPT duration                   | 1.116 | 0.821, 1.517  | 0.485          |

DEB: drug-eluting balloon; DES: drug-eluting stent; NSTEMI: non-ST-segment elevation myocardial infarction;

TIMI: thrombolysis in myocardial infarction; NIRA: non-infarct-related artery with stenosis; DAPT: dual antiplatelet therapy.

**Supplementary Table S2.** Clinical outcomes during 1-year of follow-up

|                       | Overall ( <i>n</i> = 276) | DEB group ( <i>n</i> = 67) | DES group ( <i>n</i> = 209) | <i>p</i> value |
|-----------------------|---------------------------|----------------------------|-----------------------------|----------------|
| DOCE                  | 14 (5.1)                  | 2 (3.0)                    | 12 (5.7)                    | 0.529          |
| Cardiac death         | 0 (0.0)                   | 0 (0.0)                    | 0 (0.0)                     | 1.000          |
| Target vessel MI      | 2 (0.7)                   | 0 (0.0)                    | 2 (1.0)                     | 1.000          |
| TLR                   | 12 (4.3)                  | 2 (3.0)                    | 10 (4.8)                    | 0.736          |
| Major bleeding events | 9 (3.3)                   | 1 (1.5)                    | 8 (3.8)                     | 0.692          |
| Heart failure         | 2 (0.7)                   | 0 (0.0)                    | 2 (1.0)                     | 1.000          |

DOCE: device-oriented composite endpoint; MI: myocardial infarction; TLR: target lesion re-vascularization; DEB: drug-eluting balloon; DES: drug-eluting stent.

**Supplementary Table S3.** Clinical outcomes beyond 1-year of follow-up

|                       | Overall ( <i>n</i> = 276) | DEB group ( <i>n</i> = 67) | DES group ( <i>n</i> = 209) | <i>p</i> value |
|-----------------------|---------------------------|----------------------------|-----------------------------|----------------|
| DOCE                  | 11 (4.0)                  | 0 (0.0)                    | 11 (5.3)                    | 0.071          |
| Cardiac death         | 1 (0.4)                   | 0 (0.0)                    | 1 (0.5)                     | 1.000          |
| Target vessel MI      | 1 (0.4)                   | 0 (0.0)                    | 1 (0.5)                     | 1.000          |
| TLR                   | 9 (3.3)                   | 0 (0.0)                    | 9 (4.3)                     | 0.119          |
| Major bleeding events | 2 (0.7)                   | 0 (0.0)                    | 2 (1.0)                     | 1.000          |
| Heart failure         | 2 (0.7)                   | 0 (0.0)                    | 2 (1.0)                     | 1.000          |

DOCE: device-oriented composite endpoint; MI: myocardial infarction; TLR: target lesion re-vascularization; DEB: drug-eluting balloon; DES: drug-eluting stent.
